# Supplementary material
Source: PubMed Central journal article supplement (PMC4837036)
Supplement: NIHMS749278-supplement.pdf [file NIHMS749278-supplement.pdf]

## Supplementary Figure 1

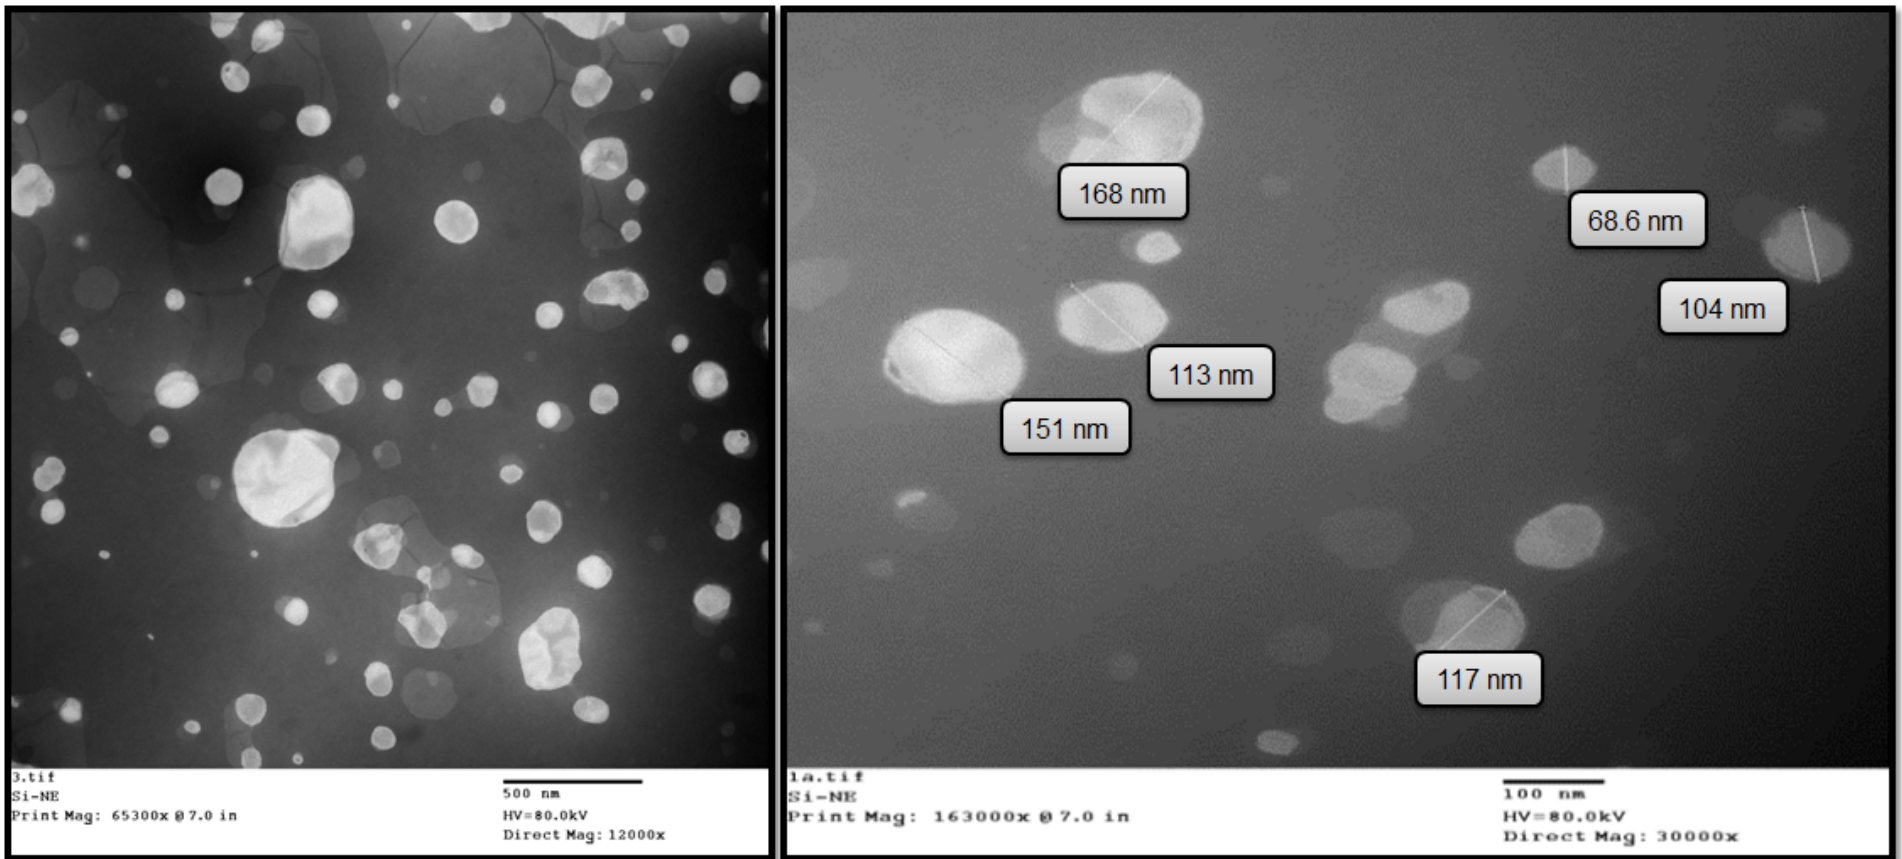

Transmission electron microscopy (TEM) image of the TNF $\alpha$  silencing siRNA-encapsulated nanoemulsion. Scale bar length is 100 nm.

## Supplementary Figure 2

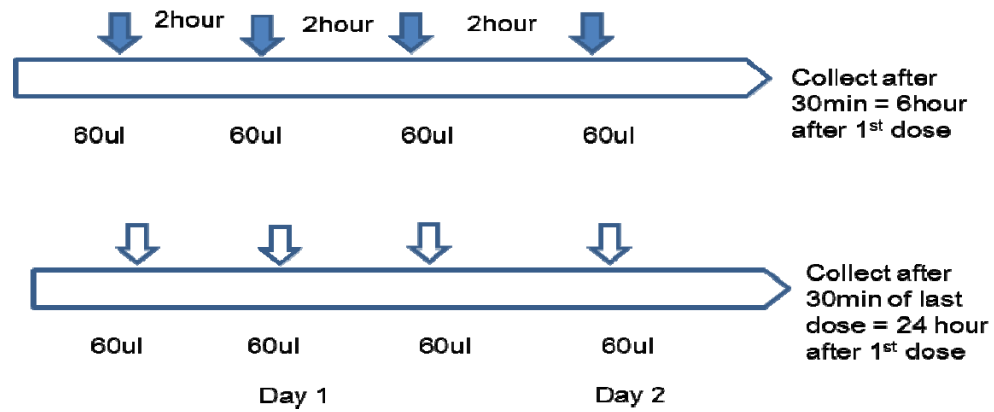

TNF $\alpha$  loaded nanoemulsion *in vivo* distribution study design and dosing schematic .

## Supplementary Figure 3

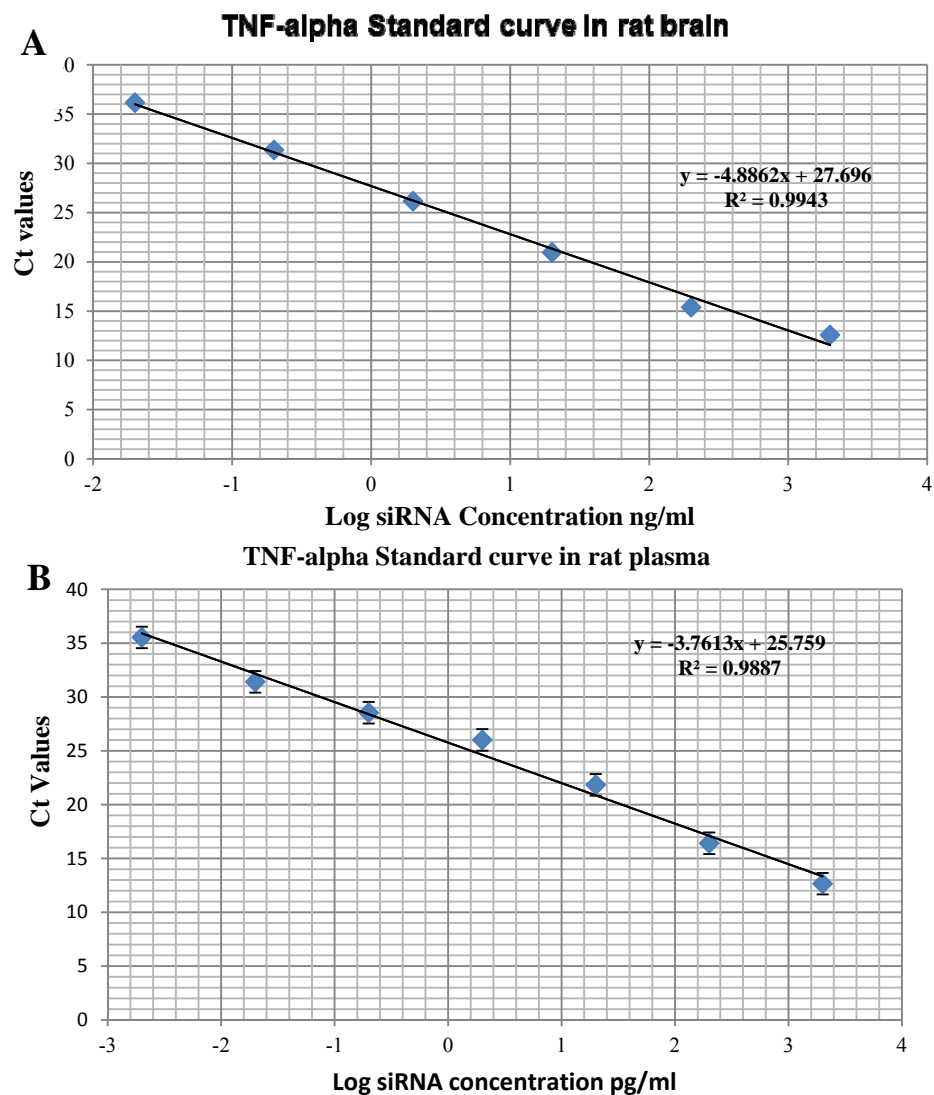

Standard curves of TNF $\alpha$  siRNA prepared using stem-loop assay in brain tissue (A) and plasma (B). Ct values of standard curves ranging from 2000ng/ml to 0.02ng/ml in brain matrix and in plasma ranging from 2000ng/ml to 0.002ng/ml in plasma matrix.
